# Supplementary material for: Palladium 1D nanoscale aggregates on a graphite surface using CTAB hemicylindrical micelle templates
Source: Royal Society of Chemistry journal article supplement (doi:10.1039/c6dt01234e), 2016-01-01
Supplement: c6dt01234e1.pdf [file c6dt01234e1.pdf]

Electronic Supplementary Information (ESI)

# Palladium 1D nanoscale aggregates on a graphite surface using CTAB hemicylindrical micelle templates

I.R. Nizameev<sup>a,b</sup>, M.K. Kadirov<sup>\*a,c</sup>, V.A. Semyonov<sup>c</sup>, L.Ya. Zakharova<sup>a</sup>, I.Kh. Rizvanov<sup>a</sup>  
and V. M. Babaev<sup>a</sup>

<sup>a</sup>A.E. Arbuzov Institute of Organic and Physical Chemistry, Kazan Scientific Center, Russian Academy  
of Sciences, 8, ul. Akad. Arbuzova, Kazan 420088, Russia.

<sup>b</sup>Kazan National Research Technical University, 10, ul. K. Marx, Kazan 420111, Russia.

<sup>c</sup>Kazan National Research Technological University, 68, ul. K. Marx, Kazan 420015, Russia.

E-mail: kamaka59@gmail.com.

## List of supporting figures.

**Figure S1.** AFM image of 2x2  $\mu\text{m}$  area of large aggregates of Pd on a HOPG surface

**Figure S2.** AFM topography-image of 2x2  $\mu\text{m}$  area of large aggregates of Pd on a HOPG surface

**Figure S3.** AFM image of a large aggregates and palladium strips on a HOPG surface

**Figure S4.** AFM image (300×300 nm) of adsorbed structure of CTAB at the graphite/solution interface  
( $t = 27.2\text{ }^{\circ}\text{C}$ )

**Figure S5.** AFM image (300×300 nm) of adsorbed structure of CTAB at the graphite/solution interface  
( $t = 29.0\text{ }^{\circ}\text{C}$ )

**Figure S6.** AFM image (300×300 nm) of adsorbed structure of CTAB at the graphite/solution interface,  
temperature is changed (28.2-28.4  $^{\circ}\text{C}$ ) from bottom of the image to its top

**Figure S7.** Profile of palladium bands along the black line (Fig.4 in article) without deconvolution  
procedure

**Figure S8.** Profile of palladium bands along the black line (Fig.4 in article) after deconvolution  
procedure (radius of the tip is 10 nm). A platform between the bands have a width of 3-4 nm

**Fig. S9.** TEM image of Pd particles deposited on the surface of formvar using CTAB micellar template

**Fig. S10.** TEM image of Pd particles deposited on the surface of formvar using CTAB micellar template

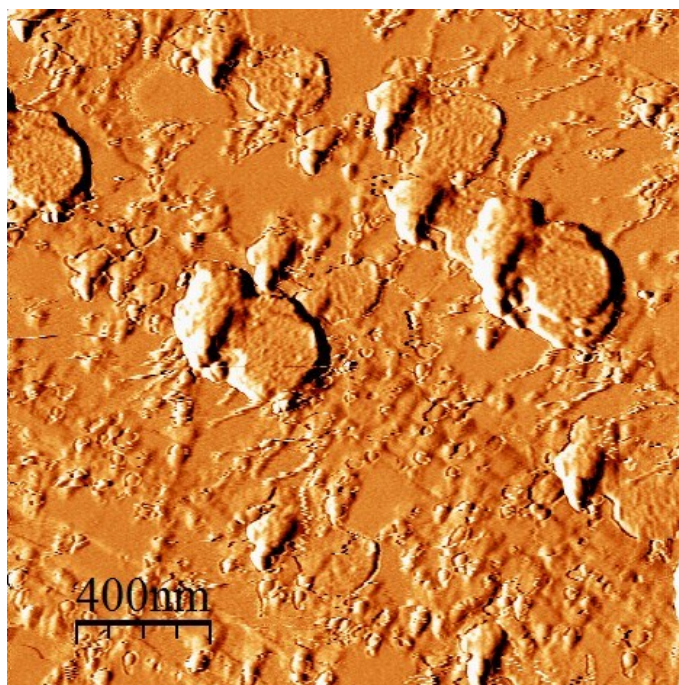

**Figure S1.** AFM image of 2x2 μm area of large aggregates palladium on a HOPG surface

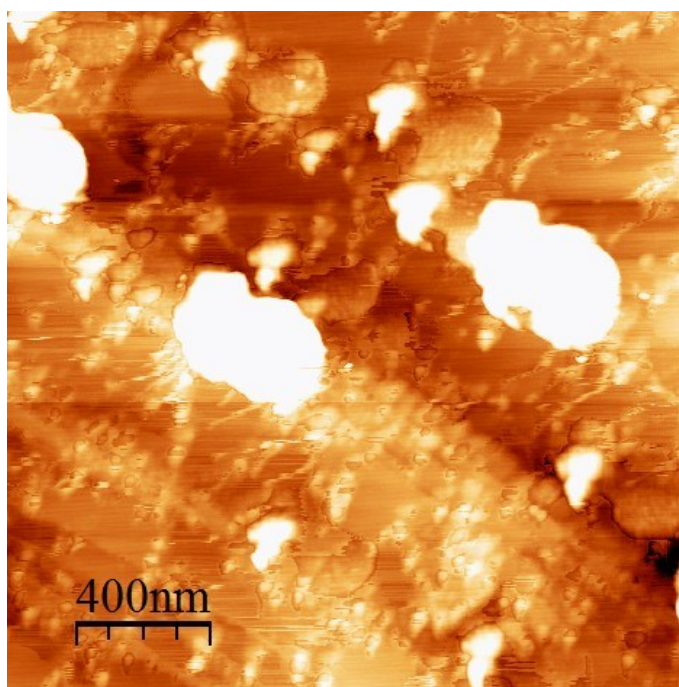

**Figure S2.** AFM topography-image of 2x2 μm area of large aggregates palladium on a HOPG surface

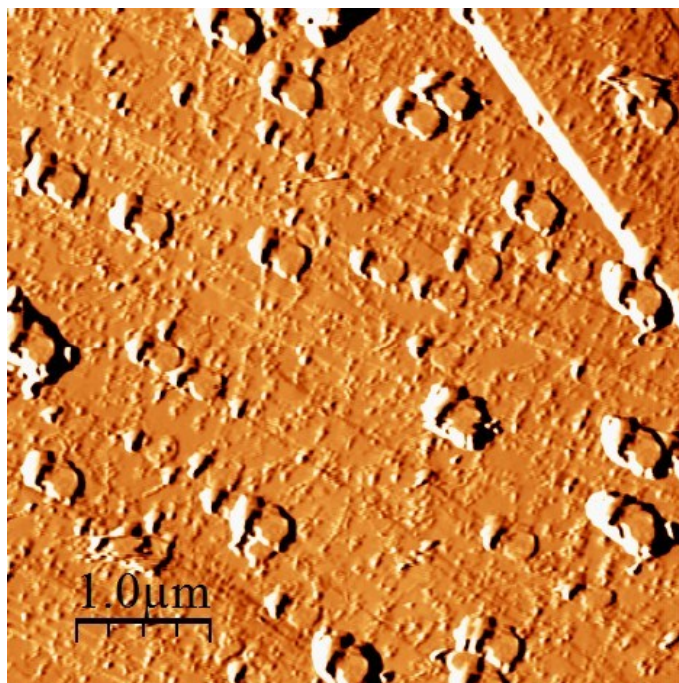

**Figure S3.** AFM image of a large aggregate and palladium bands on a HOPG surface

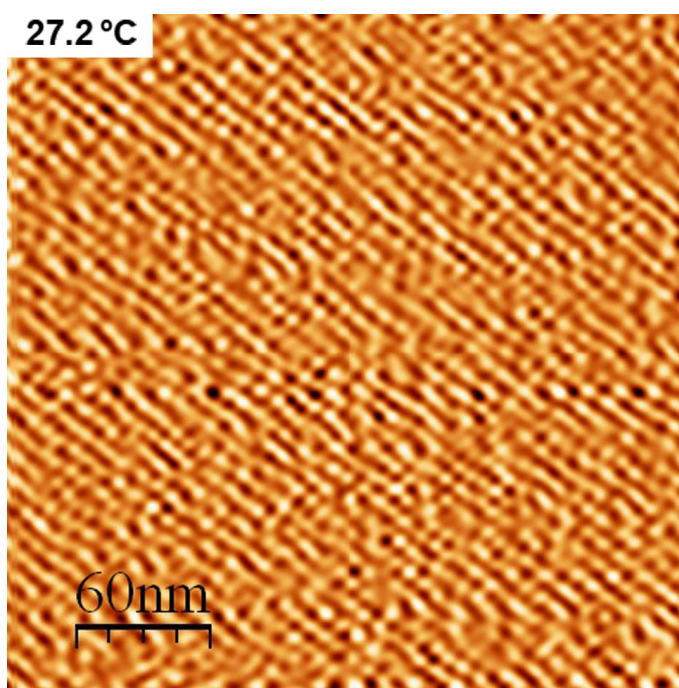

**Figure S4.** AFM image (300×300 nm) of adsorbed structure of CTAB at the graphite-water interface (t = 27.2 °C)

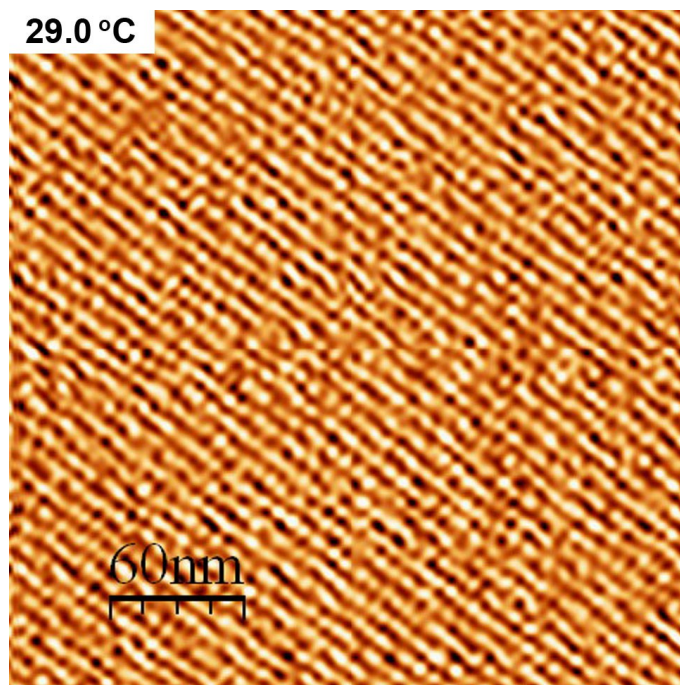

**Figure S5.** AFM image (300×300 nm) of adsorbed structure of CTAB at the graphite-water interface (t = 29.0 °C)

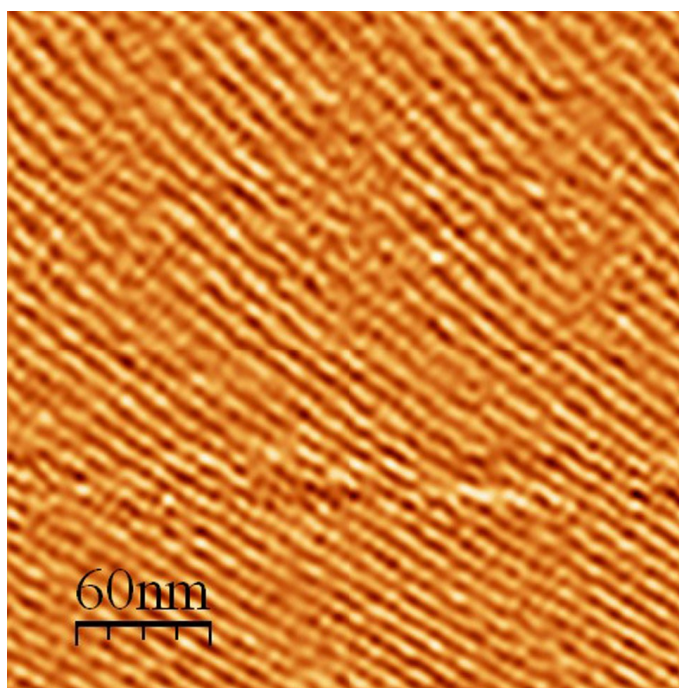

**Figure S6.** AFM image (300×300 nm) of adsorbed structure of CTAB at the graphite-water interface, from bottom of image to its top temperature is changed (28.2-28.4 °C)

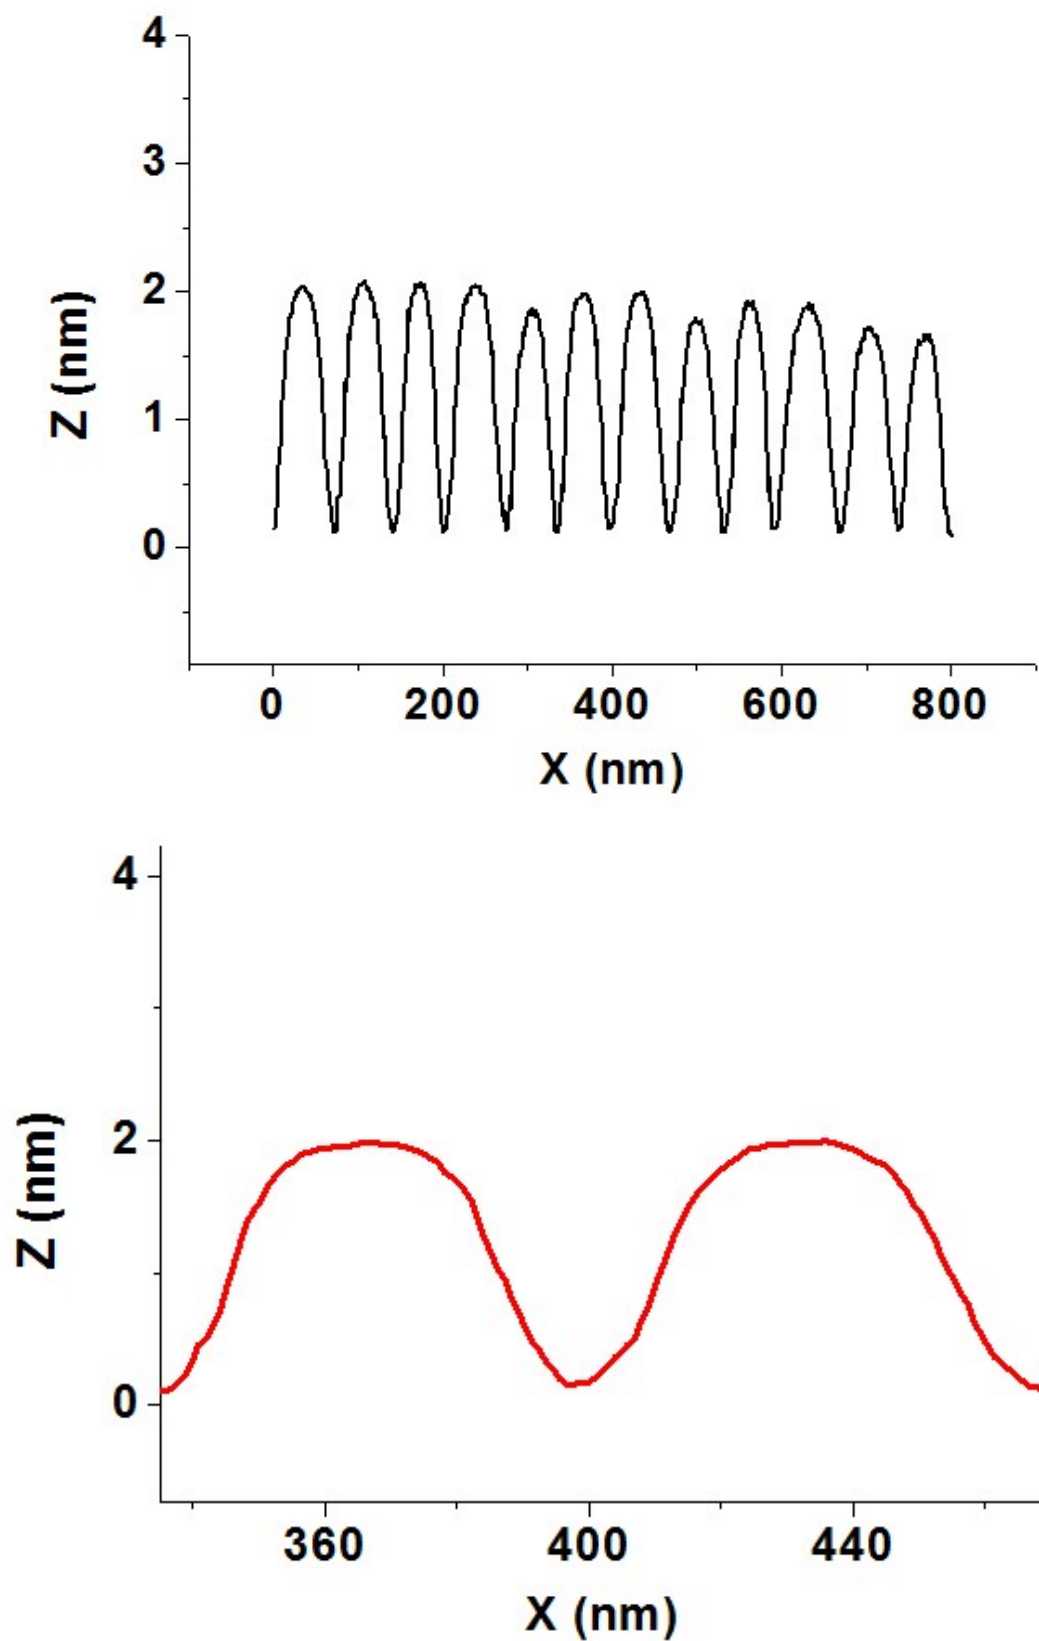

**Figure S7.** Profile of palladium bands along the black line (Fig.4 in article) without deconvolution procedure

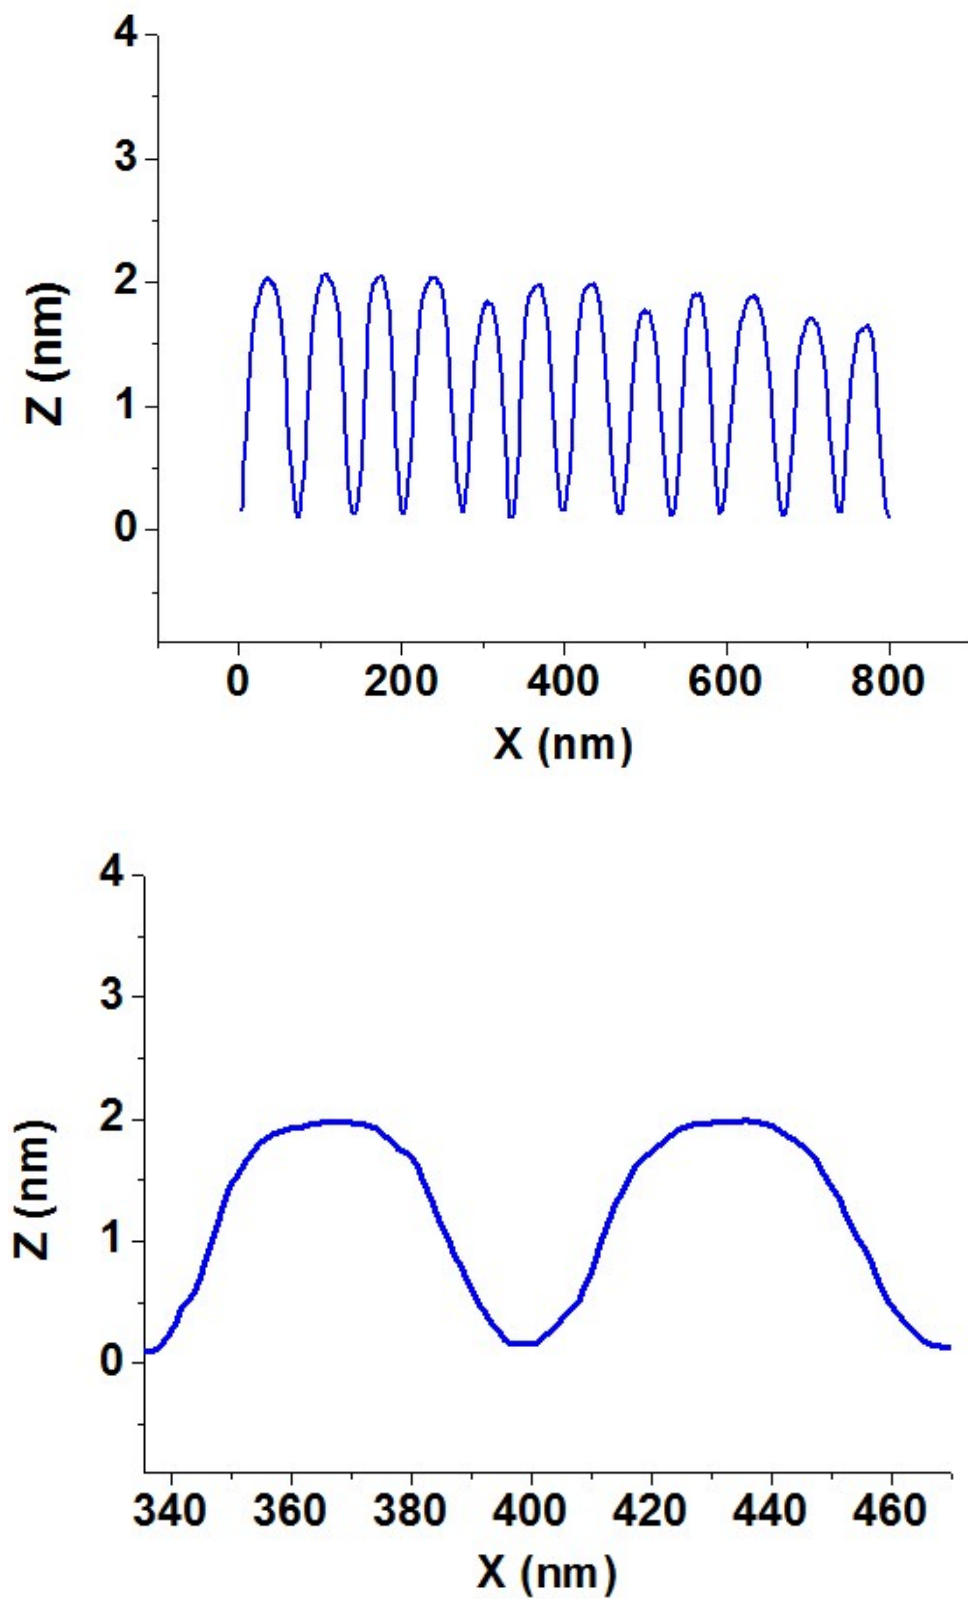

**Figure S8.** Profile of palladium bands along the black line (Fig.4 in article) after deconvolution procedure (radius of the tip is 10 nm). Platform between the bands have a width of 3-4 nm

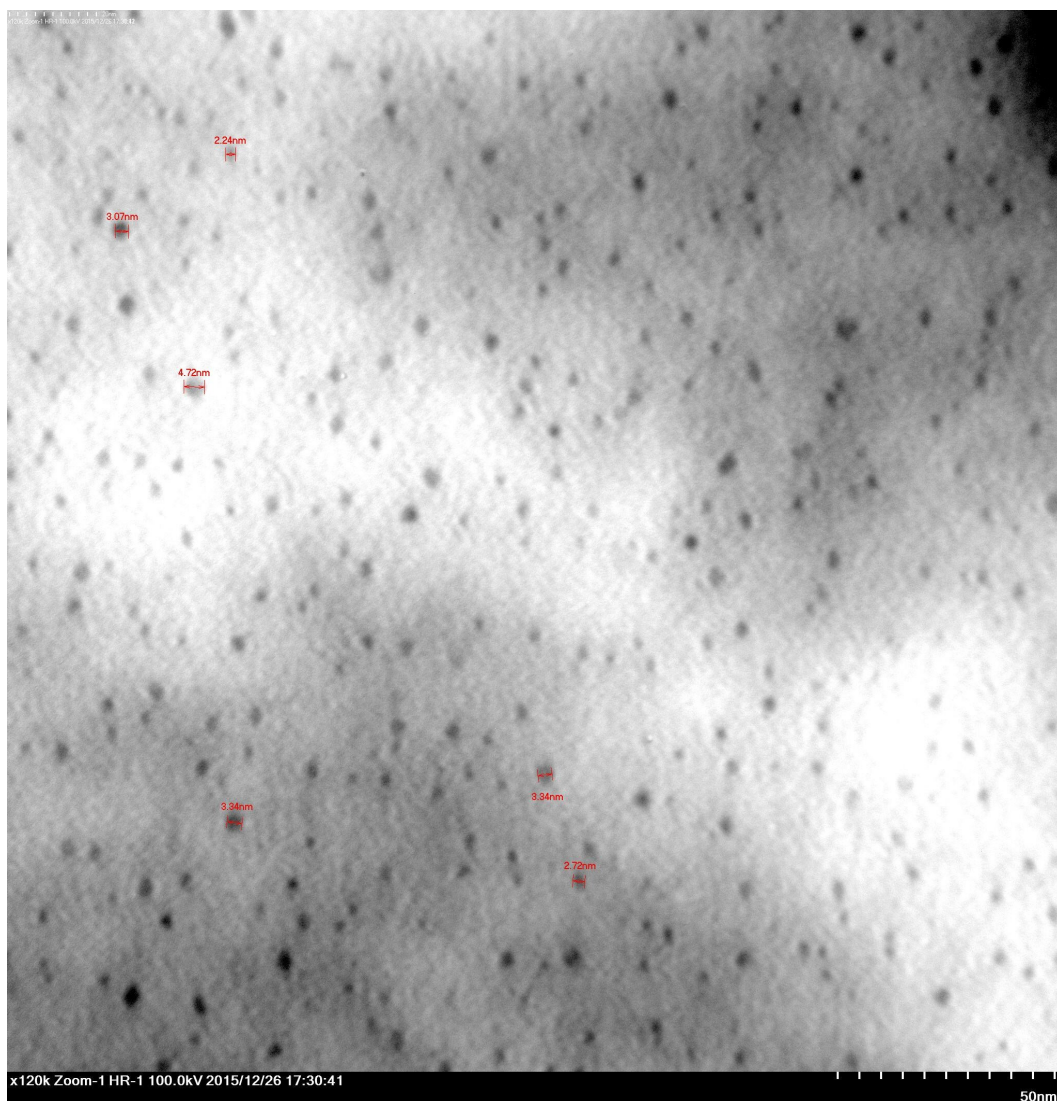

**Fig. S9.** TEM image of Pd particles deposited on the surface of formvar using CTAB micellar template

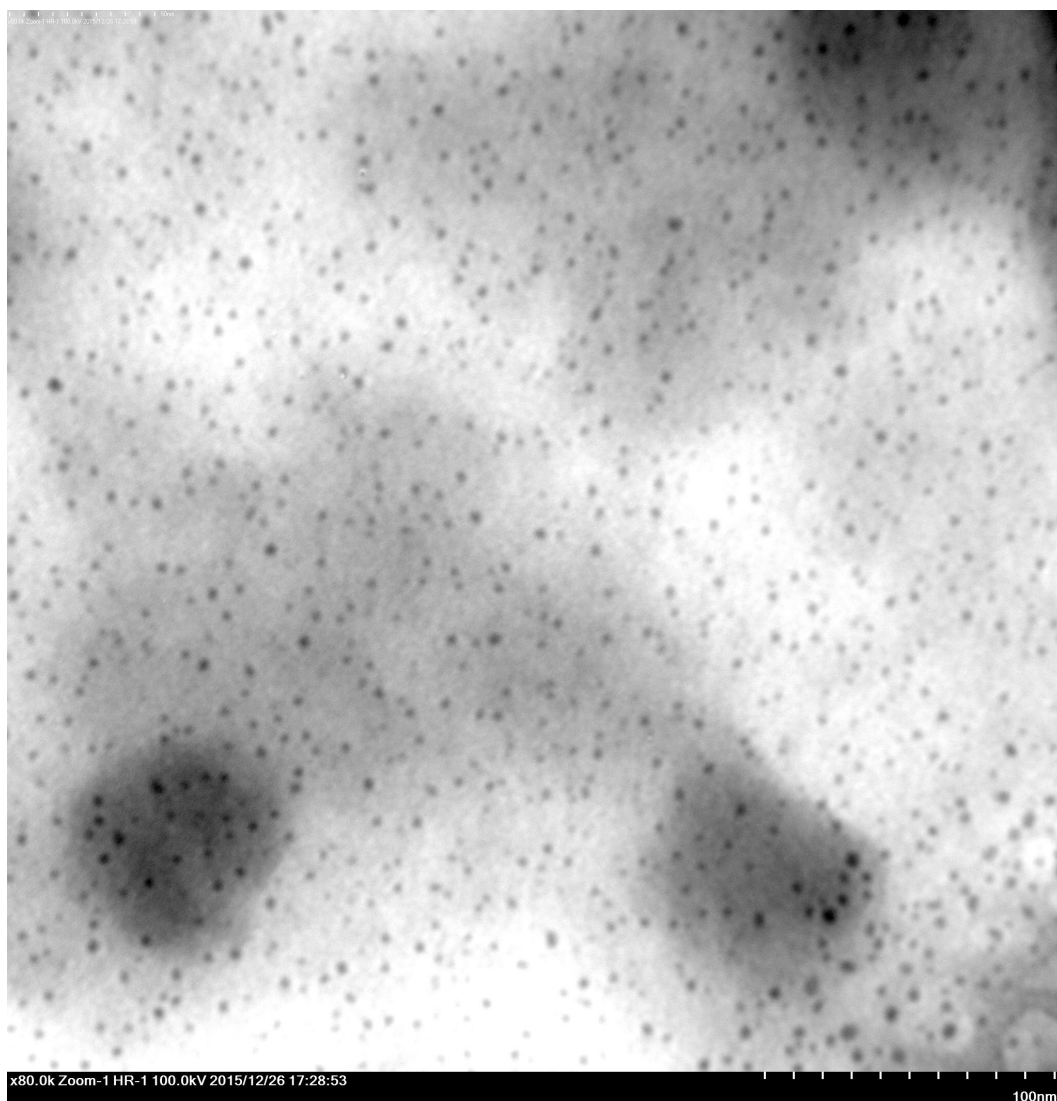

**Fig. S10.** TEM image of Pd particles deposited on the surface of formvar using CTAB micellar template.
